# Supplementary material for: Metabolomics analysis of multidrug-resistant breast cancer cells in vitro using methyl-tert-butyl ether method
Source: PubMed Central journal article supplement — RSC Adv. 2018 Apr 26;8(28):15831–41. doi: 10.1039/c7ra12952a (PMC9080077; doi:10.1039/c7ra12952a), 2018-04-26
Supplement: RA-008-C7RA12952A-s001.pdf [file RA-008-C7RA12952A-s001.pdf]

**Electronic Supplementary Material (ESI) for RSC Advances**

**This journal is © The Royal Society of Chemistry 2017**

**Electronic Supporting Information for**

**Metabolomics analysis of multidrug-resistant breast cancer cells in vitro using methyl-tert-butyl ether method**

**Li Zong,<sup>a,b</sup> Zifeng Pi,<sup>a</sup> Shu Liu<sup>a\*</sup>, Zhiqiang Liu<sup>a</sup>, Fengrui Song<sup>a\*</sup>**

<sup>a</sup>National Center of Mass Spectrometry in Changchun, Jilin Province Key Laboratory of Chinese Medicine Chemistry and Mass Spectrometry, Changchun Institute of Applied Chemistry, Chinese

Academy of Sciences, Changchun 130022, China

<sup>b</sup>University of Chinese Academy of Sciences, Beijing 100039, China

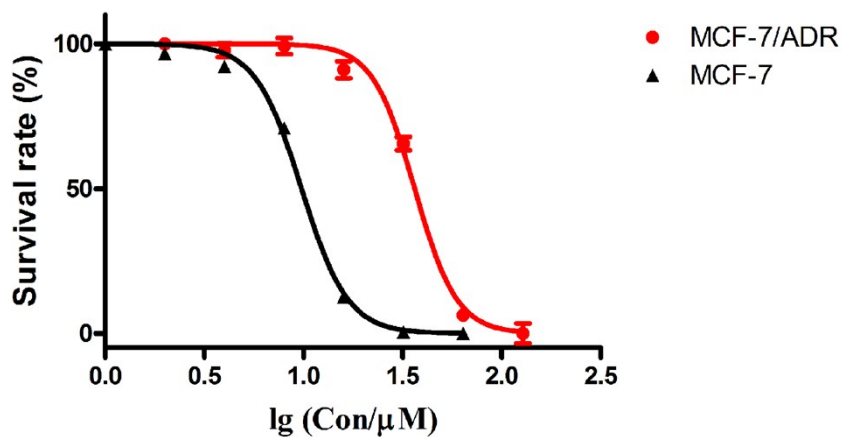

**Fig. S1** Drug sensitivity of MCF-7/ADR and parental cells against adriamycin. Dose-response curves for the two cell lines in the presence of adriamycin. Data are presented as the mean  $\pm$  standard deviation of three independent experiments.

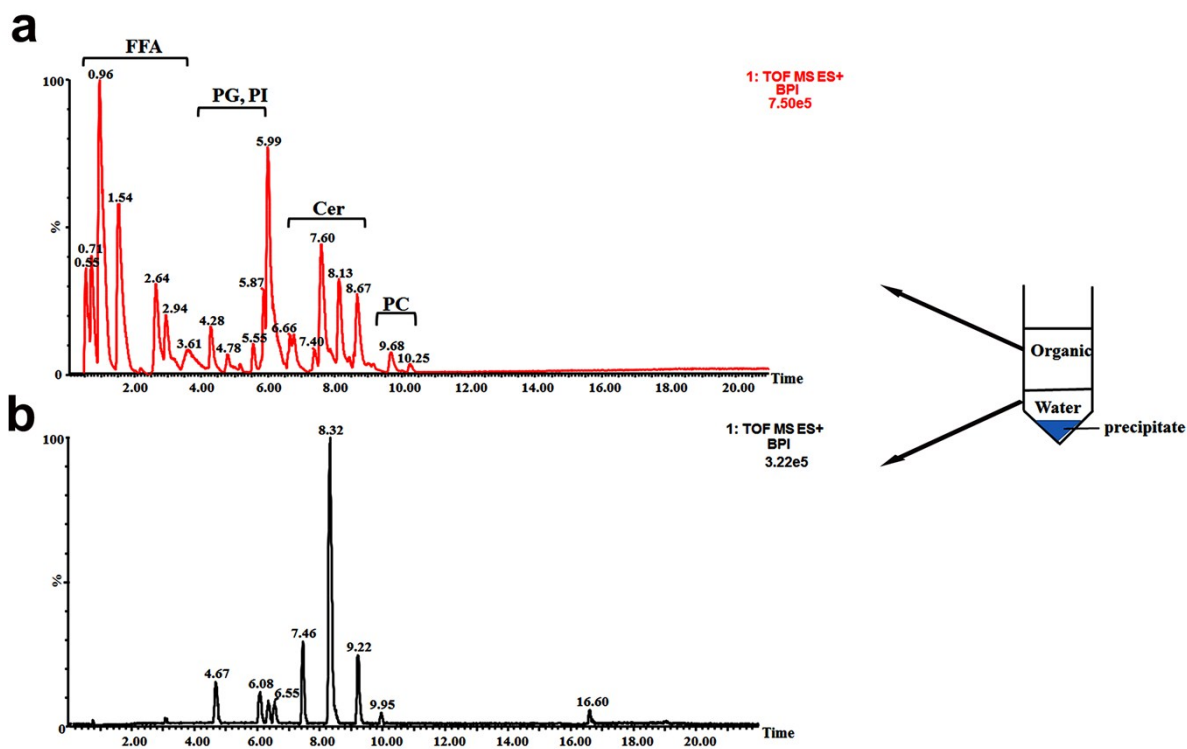

**Fig. S2** Typical base peak intensity (BPI) chromatograms of non-polar (A) and polar (B) metabolites from MCF-7/ADR in positive ion mode.

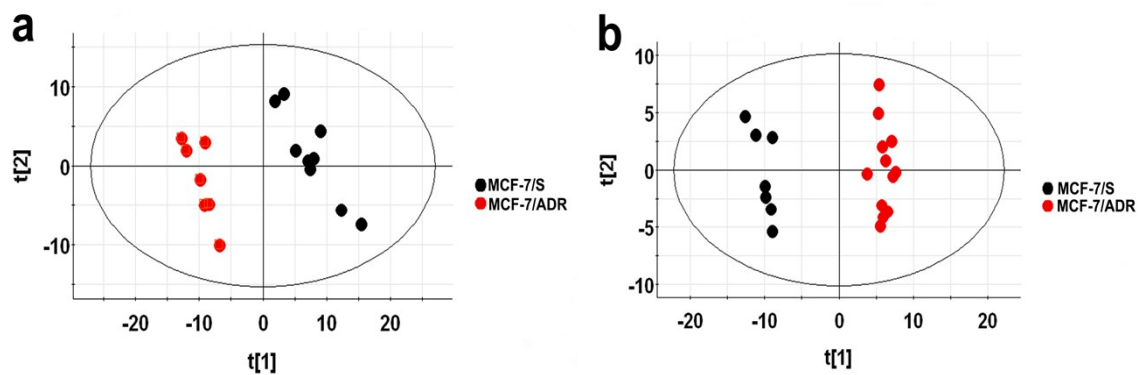

**Fig. S3** Scores plots of PCA model with MS data of polar metabolites in positive and negative ion mode. Scores plot of PCA model with MS data of metabolites from the MCF-7/S (black) and MCF-7/ADR (red) cells.

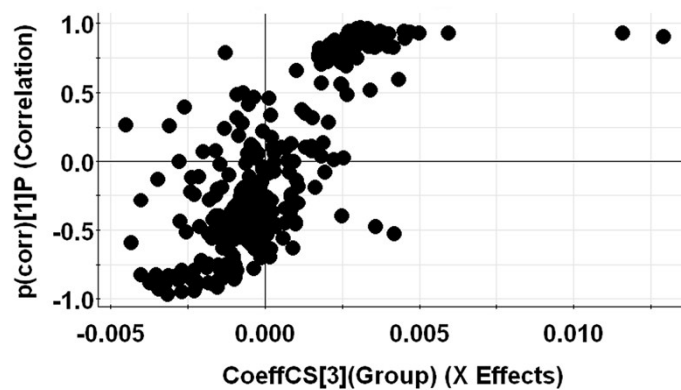

**Fig. S4** S-plot of OPLS-DA model with MS data of non-polar metabolites in negative ion mode.

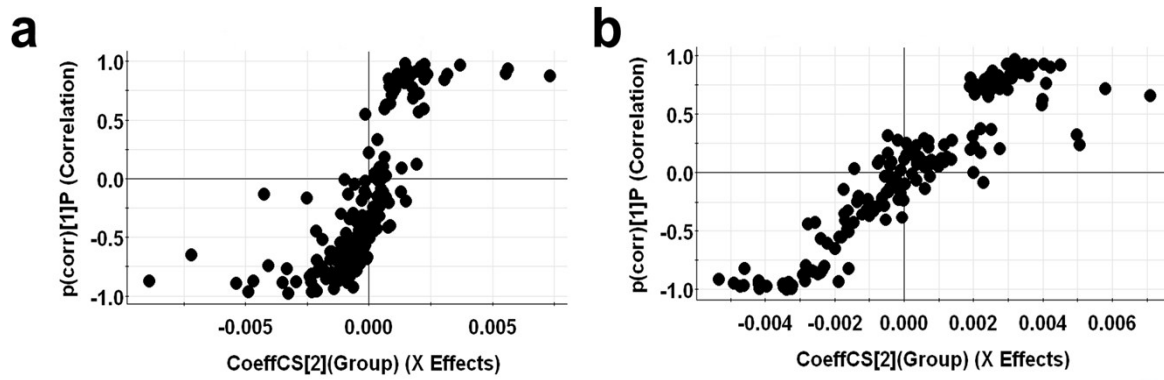

**Fig.S5** S-plot of OPLS-DA model with MS data of polar metabolites in positive and negative ion mode.

---

**Table S1** Result from the metabolic pathway analysis.

|                                 | Total | Expected | Hits | Raw p     | -log(p) | Holm adjust | FDR     | Impact  |
|---------------------------------|-------|----------|------|-----------|---------|-------------|---------|---------|
| Sphingolipid metabolism         | 25    | 0.10386  | 2    | 0.0044301 | 5.4193  | 0.3544      | 0.3544  | 0.1402  |
| Glycerophospholipid metabolism  | 39    | 0.16203  | 2    | 0.010607  | 4.5462  | 0.83796     | 0.42428 | 0.1037  |
| Arachidonic acid metabolism     | 62    | 0.25758  | 2    | 0.02572   | 3.6605  | 1           | 0.68586 | 0.01731 |
| Linoleic acid metabolism        | 15    | 0.062318 | 1    | 0.06071   | 2.8017  | 1           | 1       | 0       |
| alpha-Linolenic acid metabolism | 29    | 0.12048  | 1    | 0.11436   | 2.1684  | 1           | 1       | 0       |
| Glutathione metabolism          | 38    | 0.15787  | 1    | 0.14737   | 1.9148  | 1           | 1       | 0.0019  |
| Fatty acid biosynthesis         | 49    | 0.20357  | 1    | 0.18622   | 1.6808  | 1           | 1       | 0       |

Note: The Total is the total number of compounds in the metabolic pathway; the Hits are the actually matched number from the user uploaded data; the raw p is the original p value calculated from the enrichment analysis; the Holm p is the p value adjusted by Holm-Bonferroni method; the FDR p is the p value adjusted using False Discovery Rate; the Impact is the pathway impact value calculated from pathway topology analysis.
